# Supplementary material
Source: HighWire-hosted journal article supplement (https://drc.bmj.com/content/5/1/e000459)
Supplement: inline-supplementary-material-1 [file inline-supplementary-material-1.docx]

Supplemental Table S1

Variables extraction in the ROSA 4 survey (2014) and ROSA 3 survey (2005)

|  | Variables | ROSA 4 (2014) | ROSA 3 (2005) |
| --- | --- | --- | --- |
| Characteristics | |  |  |
|  | Diabetes duration | 2014 minus year of diagnosis | 2005 minus year of diagnosis |
|  | Ethnicity | Caucasians or others | Caucasians or others |
|  | Height | If ever registered | If ever registered |
|  | Weight | 15 months | 12 months |
|  | BMI | 15 months | 12 months |
|  | Current smokers | *No;* if ever registered as non-smoker.  *Yes*; if registered as current smoker the last 5 years and not changed smoking status | *No;* if ever registered as non-smoker.  *Yes*; if registered as current smoker the last 3 years |
| Complications | |  |  |
| *Microvascular complications* | |  |  |
|  | Retinopathy | If ever registered | If ever registered |
|  | Reduced foot sensibility | If ever registered | If ever registered |
| *Macrovascular complications* | |  |  |
|  | Coronary heart disease | If ever registered | If ever registered |
|  | Stroke | If ever registered apoplexia cerebri | If ever registered apoplexia cerebri or TIA |
|  | Diabetic foot ulcer | If ever registered | If ever registered |
| Processes of care | |  |  |
|  | HbA1c | 12 months | 12 months |
|  | Blood pressure | 15 months | 12 months |
|  | Lipids | 36 months | 36 months |
|  | Creatinine/eGFR | 36 months |  |
|  | Documentation of smoking status | Non-smokers if ever registered. Smokers 5 years | Non-smokers if ever registered. Smokers 36 months. |
| *Microvascular screening* | |  |  |
|  | Monofilament test | 15 months | 12 months |
|  | Albuminuria | 12 months | 12 months |
|  | Eye examination | Eye examination 24 months, referral eye specialist 30 months | Eye examination or referral to eye specialist 24 months |
| **Medication** | |  |  |
|  | | Digitally extracted prescriptions 15 months | Digitally extracted prescriptions |

Retinopathy: Non-proliferative and proliferative retinopathy regardless of treatment, macula oedema excluded.

Reduced foot sensibility: Pathological monofilament test and/or any form of vibration test

Monofilament test: 10-g monofilament, pathological if abscense of sensation of ≥1 of 8 touches

Coronary heart disease: Acute myocardial infarction, angina, percutaneous coronary intervention/coronary artery bypass surgery. TIA: Transient ishemic attacks

**2014:** 12 months (Jan. 1st to Dec. 31st 2014), 15 months (Oct. 1st 2013 to Dec. 31st 2014), 24 months (Jan. 1st 2004 to Dec. 31st 2005), 30 months (July 1st 2012 to Dec. 31st 2014).

**2005:** 12 months (Jan. 1st to Dec. 31st 2005), 24 months (Jan 1st 2004 to Dec. 31st 2005), 36 months (Jan. 1st 2003 to Dec.31st 2005)
