# Supplementary material
Source: HighWire-hosted journal article supplement (https://drc.bmj.com/content/5/1/e000459)
Supplement: inline-supplementary-material-3 [file inline-supplementary-material-3.docx]

Supplemental Table S2

Characteristics of type 2 diabetes patients in general practice in Norway in 2014 (ROSA 4) compared with 2005 (ROSA 3)

| Characteristics | Valid cases 2014/2005  n (%) | 2014  (n=9464) | 2005  (n=5463) |
| --- | --- | --- | --- |
| Male (%) | 100/100 | 54.6 | 50.4 |
| Age (years) | 100/100 | 66.0 (48.0 to 82.0) | 65.9 (48.0 to 83.0) |
| Caucasian (%) | 99/100 | 86.3 | 89.7 |
| Current smokers (%) | 79/56 | 22.7 | 25.2 |
| Urban (%) | 100/100 | 85.2 | 80.4 |
| Diabetes duration (years) | 94/94 | 7.0 (1.0 to 18.0) | 5.0 (1.0 to 14.0) |
| BMI (kg/m2) | 45/37 | 29.2 (23.6 to 37.7) | 29.0 (23.3 to 37.2) |
| Bariatric surgery (%) | 100/ NA | 1.5 | NA |

Values given as median (10-90 percentiles) unless otherwise noted. NA=not available.
